# Supplementary material
Source: MDPI journal article supplement (https://www.mdpi.com/2304-6775/12/2/12)
Supplement: s1 [file s1]

Supplementary Materials

# Coping with the Inequity and Inefficiency of the H-Index: A Cross-Disciplinary Empirical Analysis

Fabio Zagonari <sup>1,\*</sup> and Paolo Foschi <sup>2</sup>

<sup>1</sup> Dipartimento di Scienze per la Qualità della Vita, Università di Bologna, C.so d'Augusto 237, 47921 Rimini, Italy

<sup>2</sup> Dipartimento di Scienze Statistiche "Paolo Fortunati", Università di Bologna, 40126 Bologna, Italy; paolo.foschi2@unibo.it

\* Correspondence: fabio.zagonari@unibo.it; Tel.: +39-0541-434135; Fax: +39-0541-434120

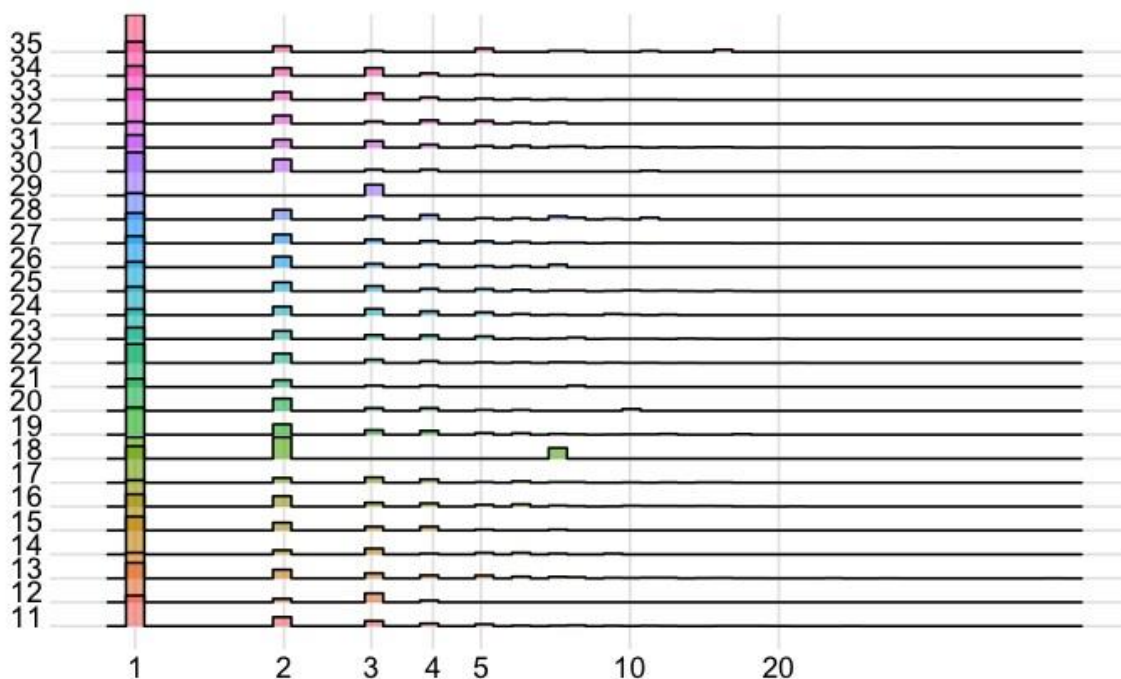

Figure S1. Histograms of (log linear)  $H_1$  for disciplines  $D_j$ .

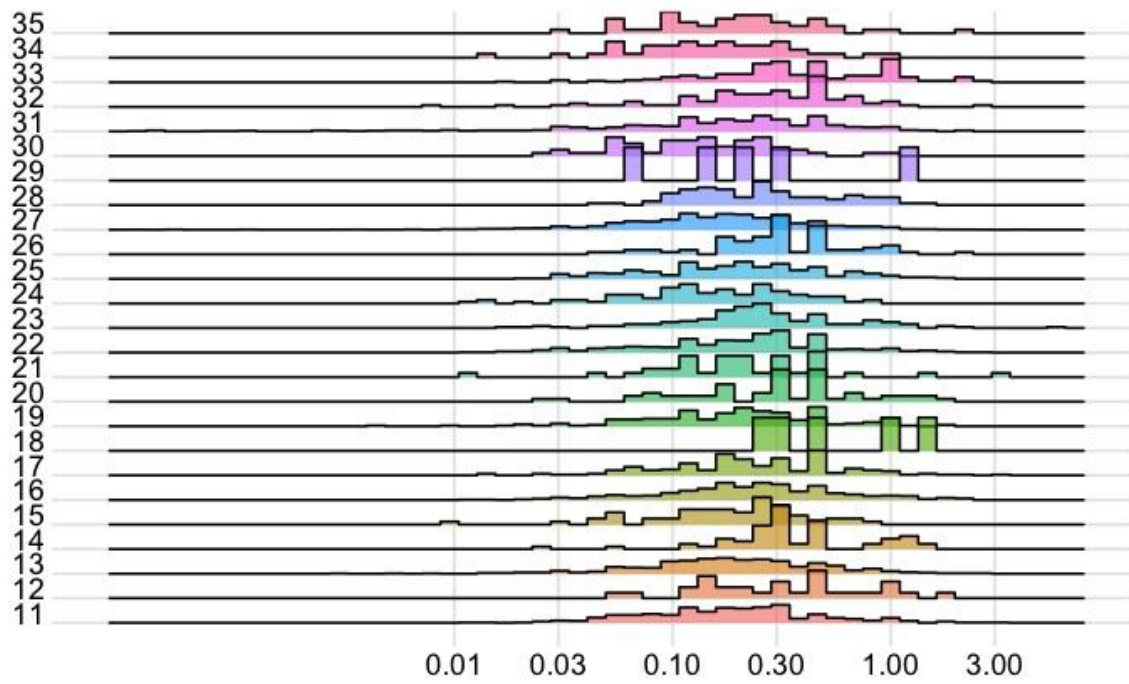

Figure S2. Histograms of (log linear)  $H_5$  for disciplines  $D_j$ .

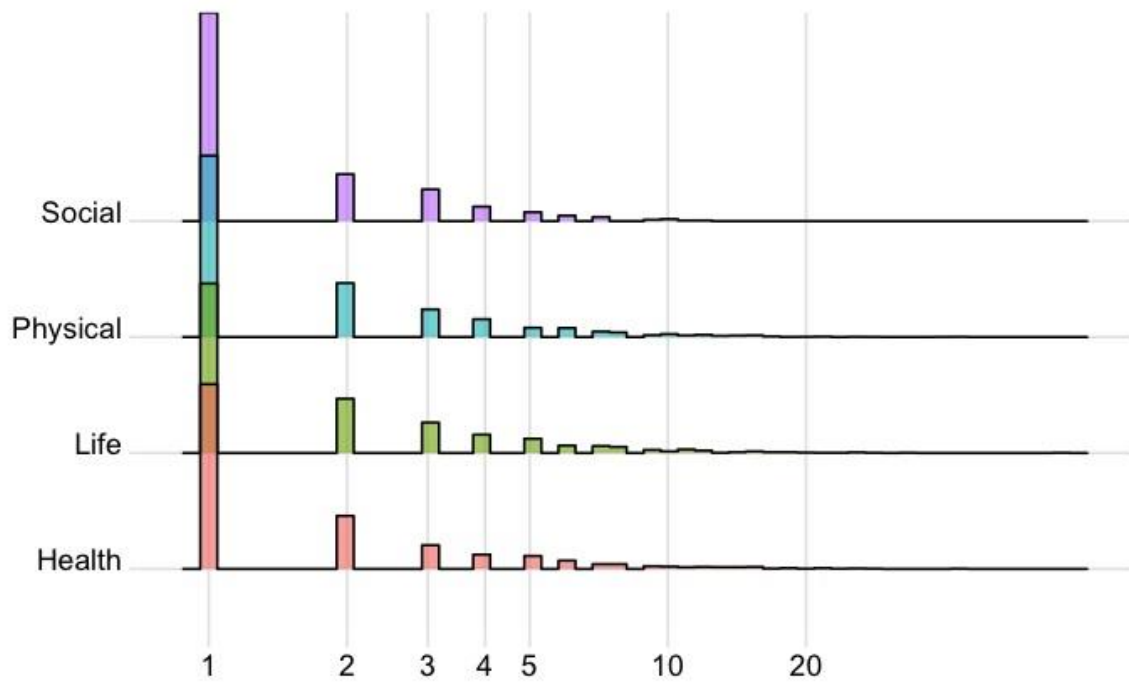

Figure S3. Histograms of (log linear)  $H_1$  for subjects  $S_k$ .

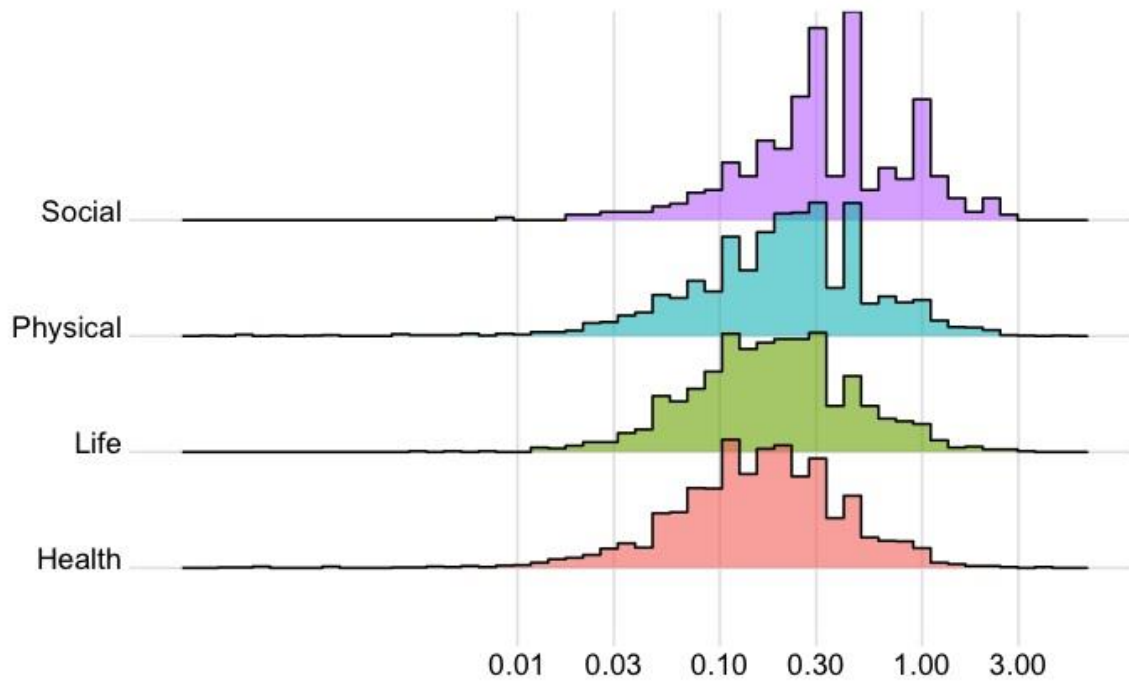

**Figure S4.** Histograms of (log linear)  $H_5$  for subjects  $S_k$ .

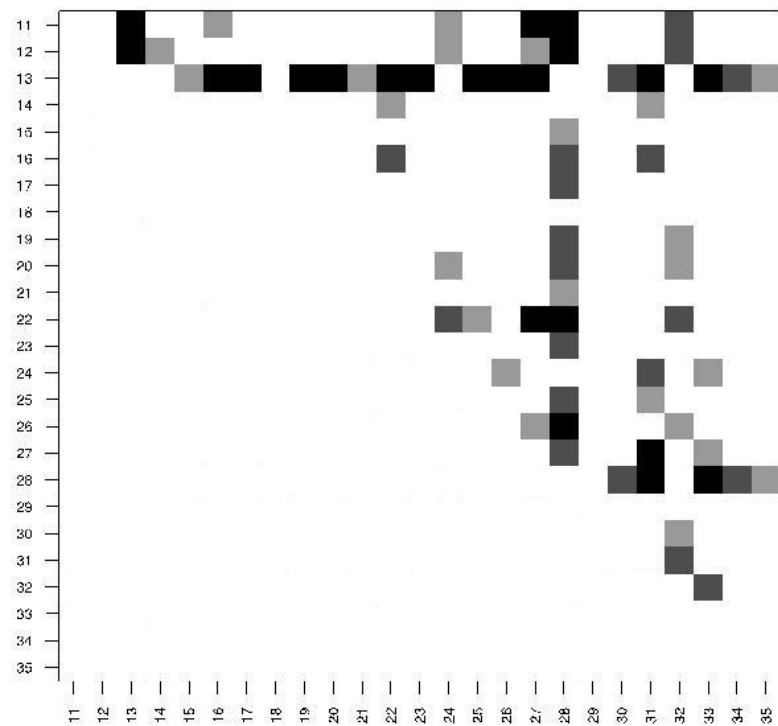

**Figure S5.** Linear Regression of  $N_{net}$  on  $N_{aut}$ ,  $\Delta H_3$  and disciplines  $D_j$ . Significance levels on the differences between disciplines. Black = 99.9% ( $D_{13} = 13 > D_{28} = 4 > D_{27} = 3$ ), dark-grey = 99%, light-grey = 95%, white < 95%.

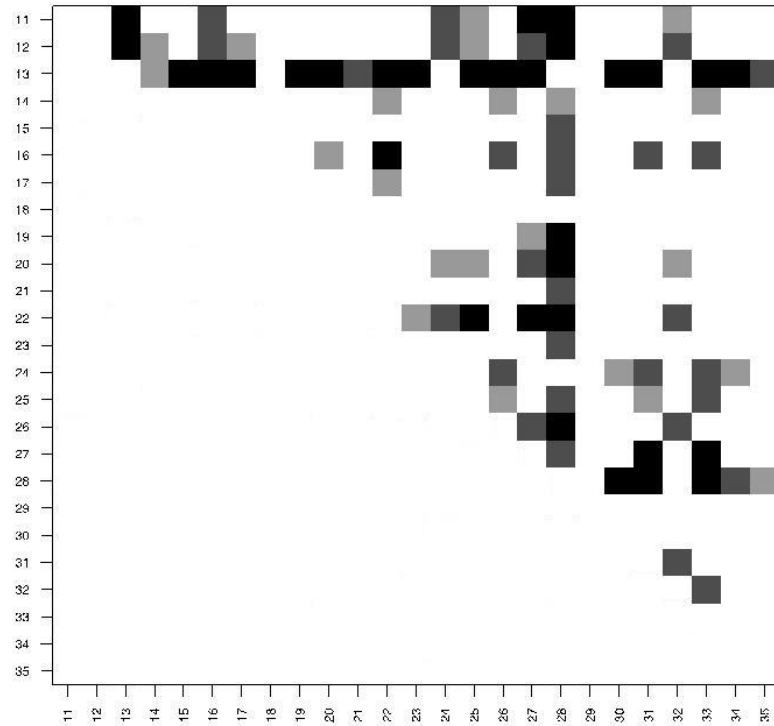

**Figure S6.** Linear Regression of Nnet on Naut, Aaut,  $\Delta H_4$  and disciplines  $D_j$ . Significance levels on the differences between disciplines. Nnet = N. net citations, Naut = N. of co-authors, Aaut = 1 for young authors. Black = 99.9% ( $D_{13} = 16 > D_{28} = 5 > D_{27} = 2$ ), dark-grey = 99%, light-grey = 95%, white < 95%.

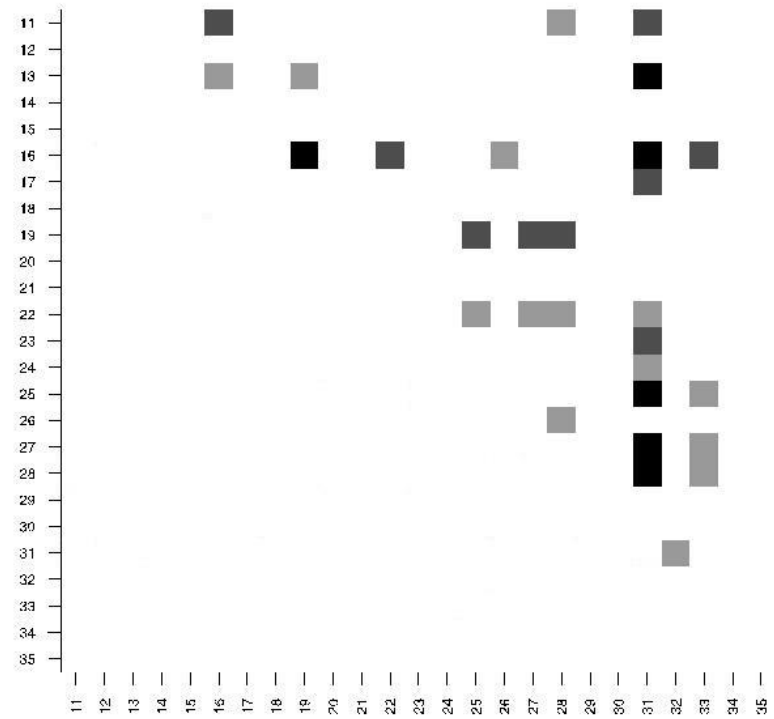

**Figure S7.** Linear Regression of Ngro on Nnet, Naut, Aaut,  $\Delta H_5$  and disciplines  $D_j$ . Significance levels on the differences between disciplines. Ngro = N. gross citations, Nnet = N. net citations, Naut = N. of co-authors, Aaut = 1 for young authors. Black = 99.9% ( $D_{31} = 5 > D_{16} = 1$ ), dark-grey = 99%, light-grey = 95%, white < 95%.
